# Supplementary material
Source: PubMed Central journal article supplement (PMC8299938)
Supplement: NIHMS1710062-supplement-Supplementary_Information.pdf [file NIHMS1710062-supplement-Supplementary_Information.pdf]

## Supplementary Information

### Mobile Health (mHealth) Viral Diagnostics Enabled with Adaptive Adversarial Learning

Ahmed Shokr,<sup>||,#</sup> Luis G. C. Pacheco,<sup>||,‡,#</sup> Prudhvi Thirumalaraju,<sup>||,#</sup> Manoj Kumar  
Kanakasabapathy,<sup>||,#</sup> Jahnvi Gandhi,<sup>||</sup> Deeksha Kartik,<sup>||</sup> Filipe S. R. Silva,<sup>||,‡</sup> Eda Erdogmus,<sup>||</sup>  
Hemanth Kandula,<sup>||</sup> Shenglin Luo,<sup>||</sup> Xu G. Yu,<sup>‡,¥,†</sup> Raymond T. Chung,<sup>§,†</sup> Jonathan Z. Li,<sup>¥,†</sup>  
Daniel R. Kuritzkes,<sup>¥,†</sup> and Hadi Shafiee<sup>||,†,\*</sup>

<sup>||</sup>Division of Engineering in Medicine, Department of Medicine, Brigham and Women's Hospital, Harvard Medical School, Boston, MA, 02139, USA.

<sup>‡</sup>Department of Biotechnology, Institute of Health Sciences, Federal University of Bahia, Salvador, BA, 40110-100, Brazil.

<sup>‡</sup>The Ragon Institute of Massachusetts General Hospital, Massachusetts Institute of Technology and Harvard University, Boston, MA, 02129, USA.

<sup>¥</sup>Division of Infectious Diseases, Brigham and Women's Hospital, Harvard Medical School, Boston, MA, 02139, USA.

<sup>§</sup>Liver Center, Gastrointestinal Division, Massachusetts General Hospital, Harvard Medical School, Boston, MA, 02114, USA.

<sup>†</sup>Harvard Medical School, Boston, MA, 02115, USA.

\* Corresponding author: Hadi Shafiee, E-mail: [hshafiee@bwh.harvard.edu](mailto:hshafiee@bwh.harvard.edu)

# These authors contributed equally.

## **Table of Contents**

### **Supplementary Figures**

**Figure S1.** Construction of the microchip image database containing real microchip images and synthetic images generated using style generative adversarial networks (StyleGANs).

**Figure S2.** The basics of fabrication and functioning of the target-specific nanoprobes.

**Figure S3.** Schematic of microchip surface functionalization.

**Figure S4.** Efficiencies of antibody immobilization and virus capture in the surface of functionalized microchips, and detailed protocol for virus capture.

**Figure S5.** Standardization steps involved in the virus capture assay development.

**Figure S6.** Probit regression analysis for definition of the assay's limits of detection.

**Figure S7.** Repeatability of the antigen detection assays for HBV, HIV, and HCV, at various viral concentrations.

**Figure S8.** Standardization of the CRISPR/dCas9-based nucleic acid detection assay.

**Figure S9.** Organization of the smartphone-taken microchip image dataset.

**Figure S10.** Consistency of image classification by trained specialists, using bubble counts.

**Figure S11.** Overall performance of the adversarial neural networks with conditioning-based image classifiers.

**Figure S12.** The microchip imaging procedure and examples of the image library.

### **Supplementary Tables**

**Table S1.** Overview of the performance of the adversarial neural networks with conditioning-based image classifiers

**Table S2.** Comparison of SPyDERMAN with CDC qRT-PCR assay for the detection of SARS-CoV-2.

**Table S3.** Detailed information about the patient samples used in this study

**Table S4.** List of antibodies, oligonucleotides, and synthetic nucleic acids used in this study

**Supplementary Videos**

**Supplementary Videos S1-S5.** The degree of microchip images separability in a 3D space, visualized by t-distribution stochastic neighbor embedding (t-SNE)

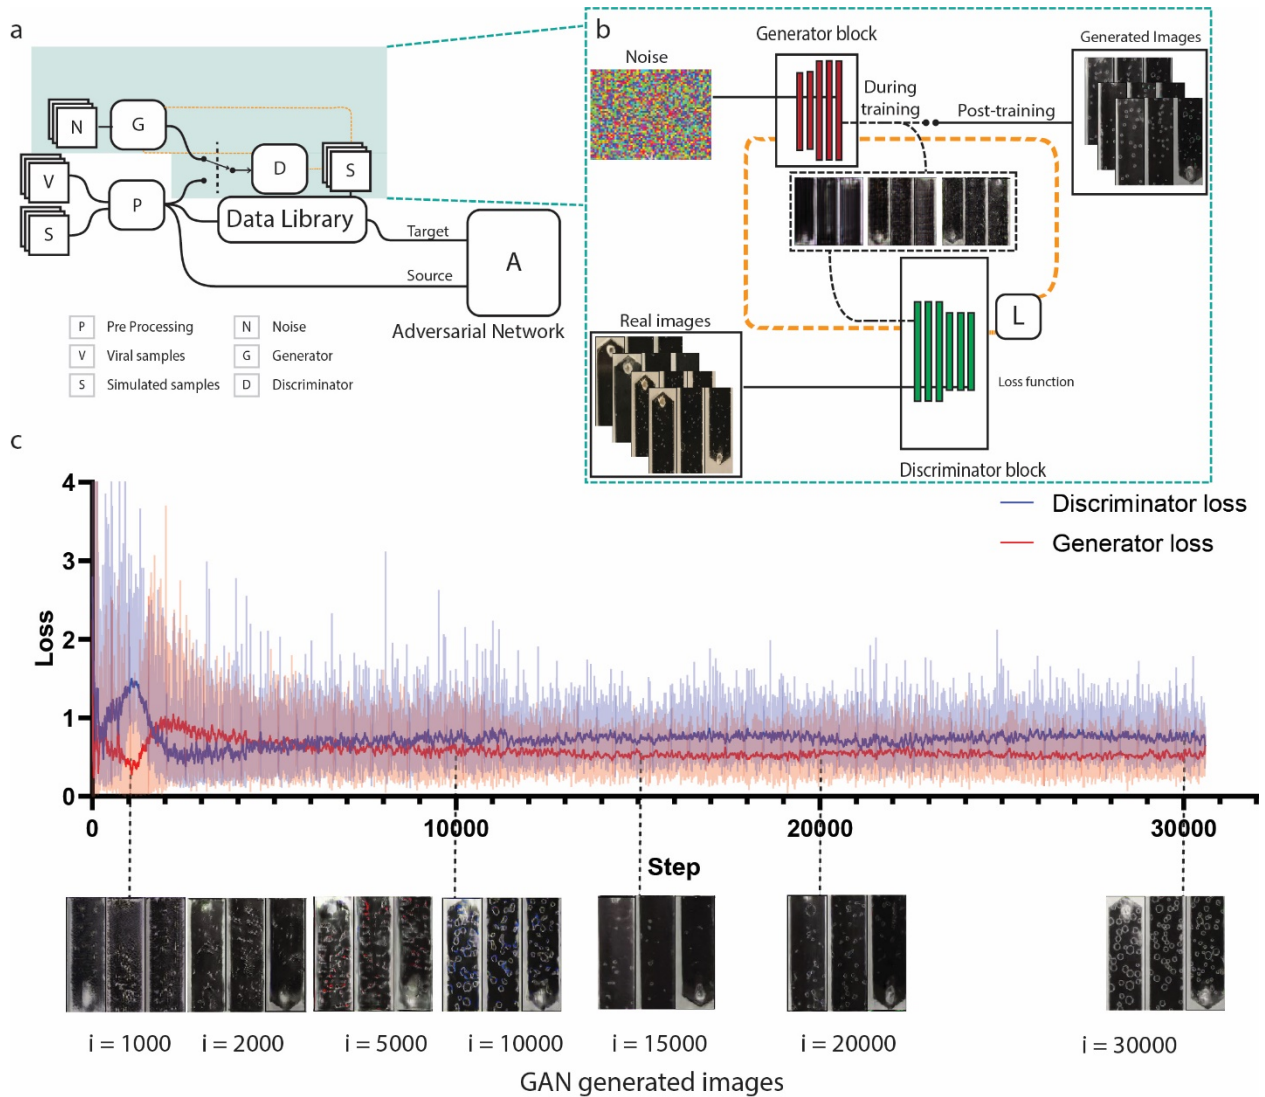

**Figure S1. Construction of the microchip image database containing real microchip images and synthetic images generated using style generative adversarial networks (StyleGANs).** **a**, The microchip image dataset is composed of 17,573 unique images, originated from real smartphone-taken microchip images from virus detection assays ( $n = 669$ ) or simulated non-specific samples ( $n = 904$ ), and synthetic images generated using StyleGANs ( $n = 16,000$ ). **b**, Schematic of the adversarial learning architecture. The synthetic image dataset was generated using a styleGAN trained and developed using the real microchip images, both the ones originated from true virus detection assays and the simulated microchip images. **c**, Generator and discriminator loss over time.

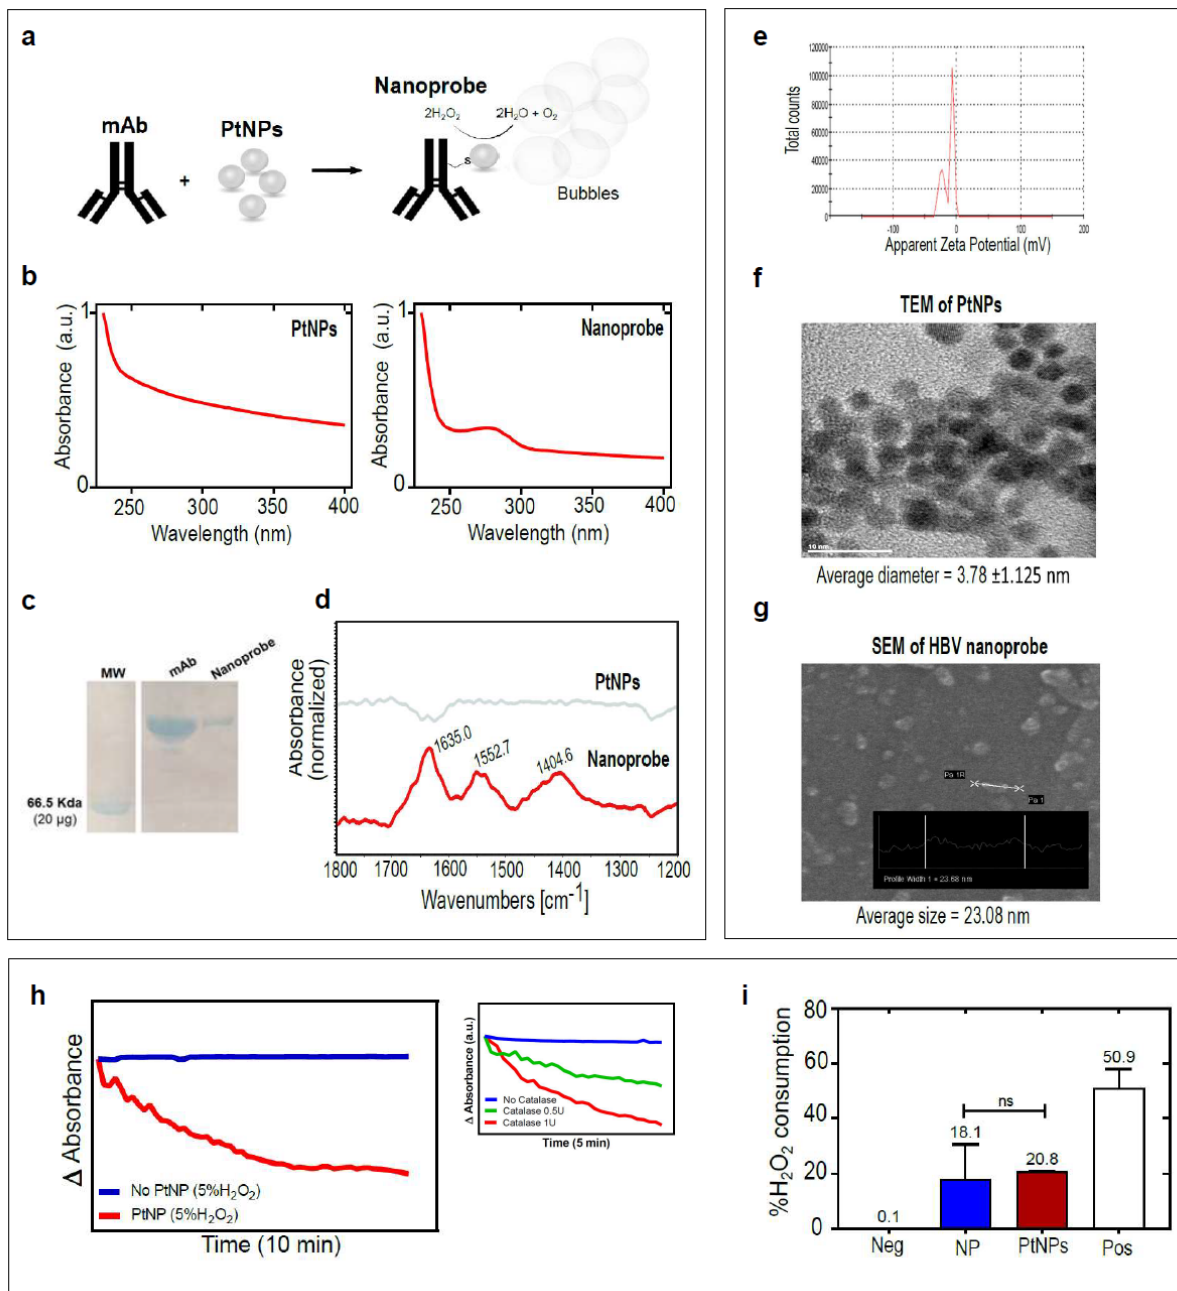

**Figure S2. The basics of fabrication and functioning of the target-specific nanoprobe.** **a**, Overview of the nanoprobe fabrication protocol. **b**, UV-Vis spectroscopy of platinum nanoparticles (PtNPs) (left panel) and an anti-HBV nanoprobe (right panel). There was a high optical absorption at lower wavelengths in both solutions, as expected for the presence of PtNPs (absorption peaks around 212 – 260 nm). A second distinctive peak around 280 nm was seen in the filtered nanoprobe solution, corresponding to the presence of the antibodies. **c**, SDS-PAGE profile of a nanoprobe solution following ten-fold concentration using a 10-KDa cut-off

centrifugal filter (Amicon Ultra-0.5 10 KDa, Millipore Sigma). The catalytically active nanoprobe solution shows a typical high molecular weight protein band corresponding to the monoclonal antibody used in the fabrication process. **d**, Fourier-transform infrared spectroscopy (FTIR) of PtNPs and anti-HBV nanoprobe. Characteristic absorption peaks at  $1635.0\text{ cm}^{-1}$ ,  $1552.7\text{ cm}^{-1}$ , and  $1404.6\text{ cm}^{-1}$  were differentially observed in the nanoprobe solution when compared to the PtNPs suspension alone, and correspond to vibrations attributed to Amide I and Amide II (C=O stretching, N-H bending, C-N stretching), typical for the presence of antibodies. **e-f**, Zeta potential and Transmission Electron Microscopy (TEM) of the PtNPs. Zeta potential was performed using a Malvern Zetasizer (Malvern Instruments, Malvern, UK). Transmission electron microscope images were obtained using a JOEL 2100 TEM microscope at an acceleration voltage of 300 kV. PtNPs were spherical in shape with diameters of  $3.78 \pm 1.125\text{ nm}$  with (scale bar = 10 nm). **g**, Field emission scanning electron microscopy (FE-SEM) images were acquired with the Zeiss instrument (resolution 1 nm, applied voltage 10-180 kV) on freshly prepared samples on a metallic sample holder. The size of the nanoprobe combined was about 23 nm. **h-i**, To test the abilities of the PtNPs and the fabricated nanoprobes in decomposing hydrogen peroxide, we performed  $\text{H}_2\text{O}_2$ -decomposition tests using an assay based on the optical absorption of hydrogen peroxide at  $\lambda = 240\text{ nm}^1$  (h), and a highly sensitive colorimetric based assay ( $\lambda_{\text{max}} = 570\text{ nm}$ ) using horseradish peroxidase (HRP)-mediated reduction of  $\text{H}_2\text{O}_2$  (Abcam, Cambridge, MA, US) (i). One microliter of a citrate-capped platinum nanoparticles suspension, containing *ca.*  $1.3 \times 10^{13}$  nanoparticles, showed a significant decrease in the absorption of a 5%  $\text{H}_2\text{O}_2$  solution (1.63 M) over the course of a 10 min. kinetic assay (h). A similar decrease in absorption was observed for the enzymatic disproportionation of  $\text{H}_2\text{O}_2$  by a native catalase from *Aspergillus niger* (Sigma-Aldrich) (h, small chart). Additionally, a ten-fold concentrated nanoprobe solution showed an  $\text{H}_2\text{O}_2$ -decomposition activity (average = 18.1%) comparable to the activity of the PtNPs stock solution (average = 20.8%) after 10 min. reaction with 0.1 mM  $\text{H}_2\text{O}_2$ , as measured by reduction in HRP-mediated conversion of the OxiRed probe (absorbance at 570 nm) when compared to the negative control (i). A positive control containing *A. niger* native catalase showed an average 50.9% reduction in the OxiRed probe color conversion during the same reaction time.

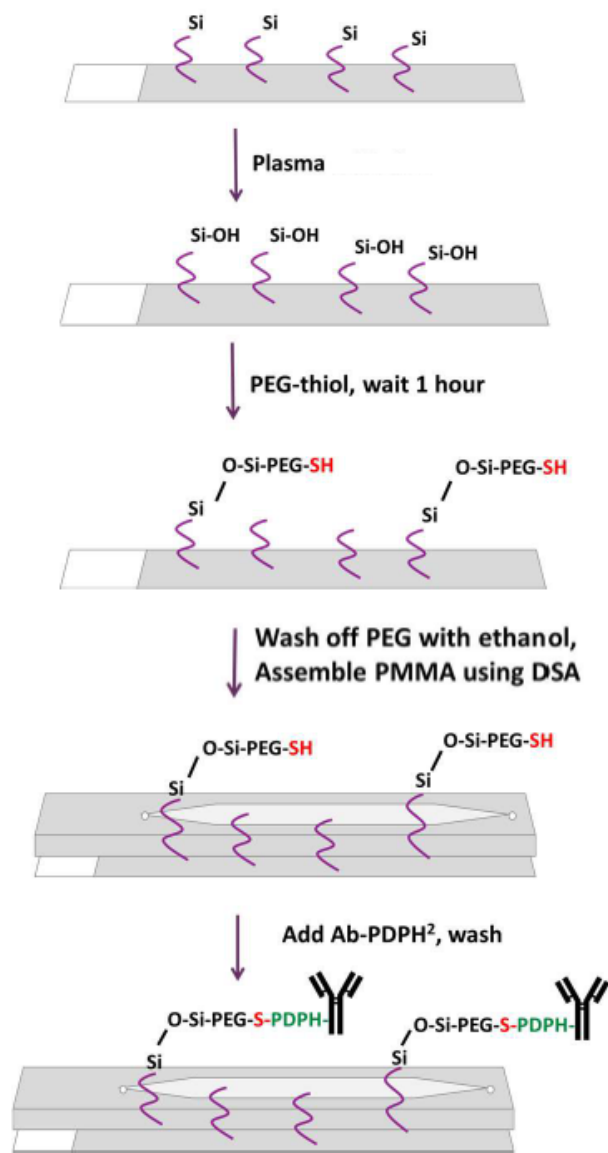

**Figure S3. Schematic of microchip surface functionalization.** PDPH = heterobifunctional crosslinking reagent 3-[2-Pyridyldithio]propionyl hydrazide. PMMA = 3.175 mm thick Poly(methyl methacrylate) sheet (8560K239, McMaster-Carr); DSA = double-sided adhesive (DSA) sheet (76  $\mu\text{m}$ , 8213, 3M / or 125  $\mu\text{m}$ , 8215, 3M). PEG-thiol = silane-PEG-thiol (20 mg/mL; Nanocs, cat. no. PG2-SLTH-5k).

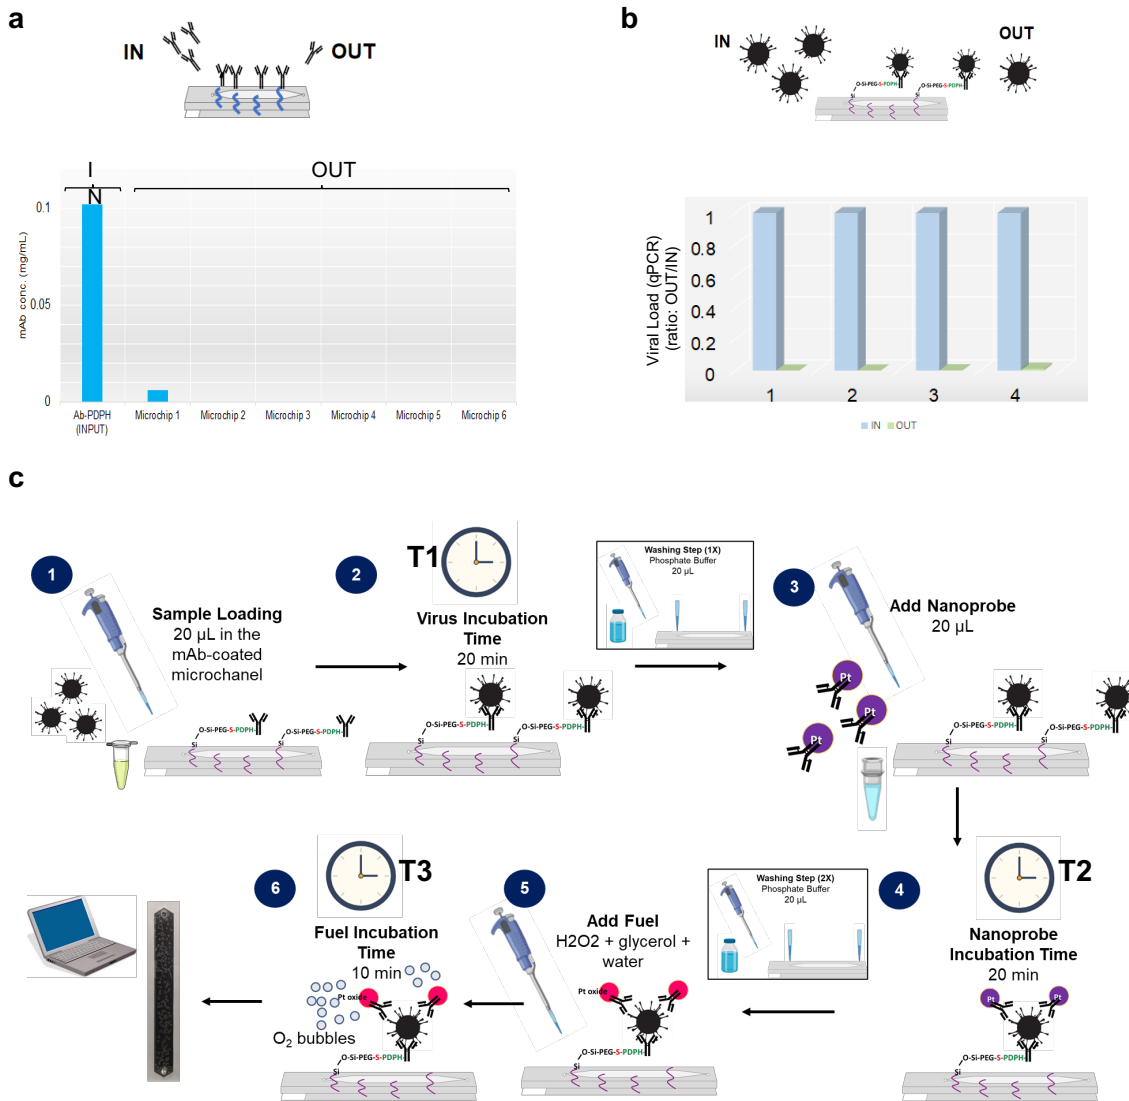

**Figure S4. Efficiencies of antibody immobilization and virus capture in the surface of functionalized microchips, and detailed protocol for virus capture. a,** Antibody concentrations before and after adding to the surface functionalized microchip were measured spectrophotometrically in different microchips ( $n = 6$ ). **b,** HBV microchips were tested with viral concentrations between  $10^3$  and  $10^6$  IU/mL. Viral loads were quantitated by real-time quantitative PCR before and after loading the samples in the microchips. Results shown are the ratio OUT / IN of quantitated viral loads ( $n = 4$  samples). **c,** The overall protocol used for detection of HBV, HIV, HCV, and SARS-CoV-2. The schematic shown is exactly the one used for HBV and HCV. For HIV and SARS-CoV-2, the virus incubation time (T1, step 2) was 45 min.



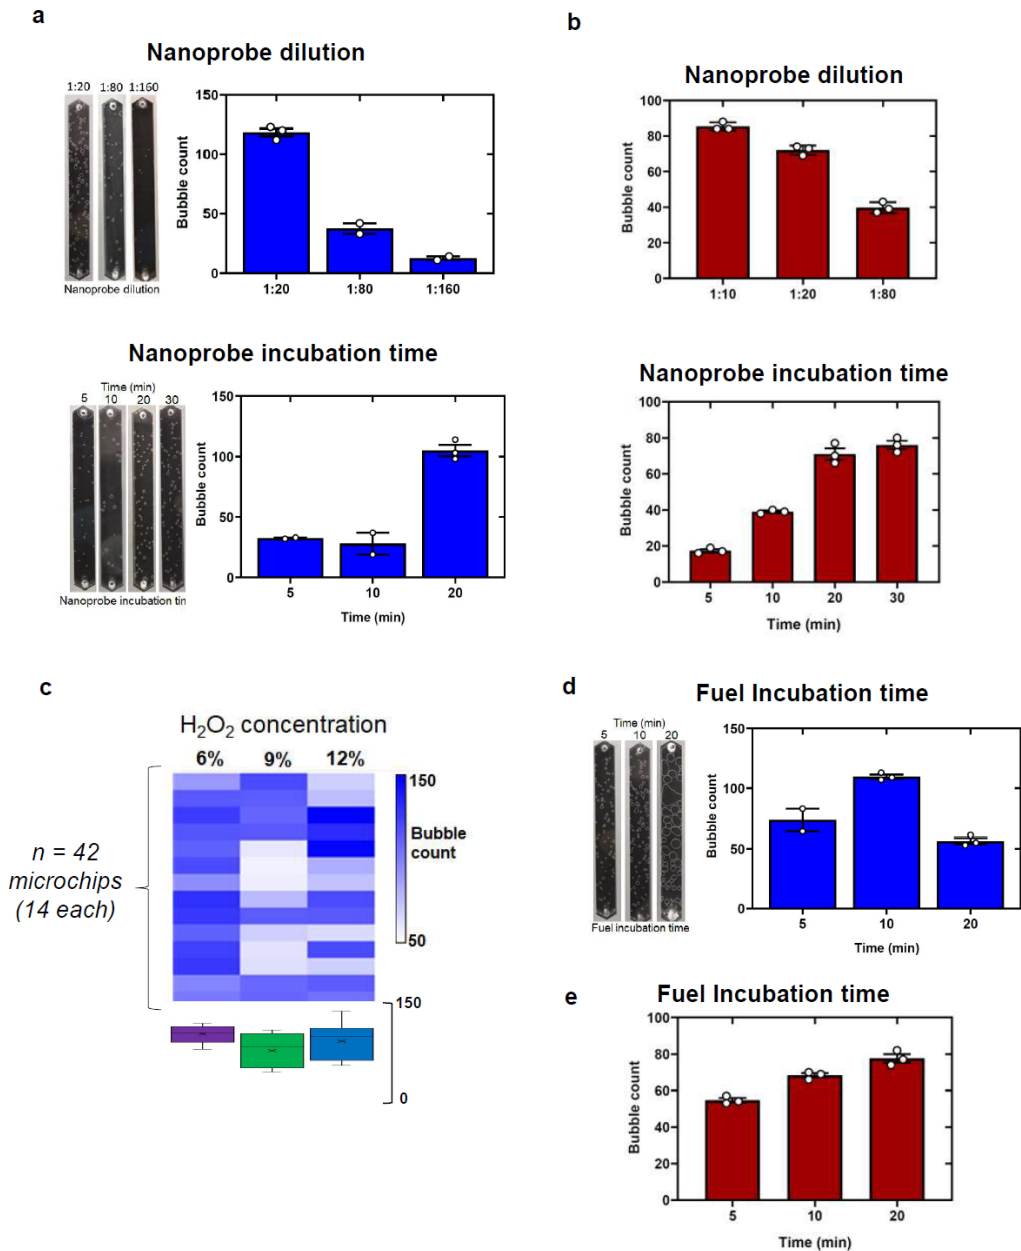

**Figure S5. Standardization steps involved in the virus capture assay development. a,** Nanoprobe dilution and incubation time used for the HBV detection assay, tested with HBV-spiked serum samples. **b,** Nanoprobe dilution and incubation time used for the HIV detection assay, tested with HIV-spiked serum samples. **c,** Stability of the bubbles detected in the microfluidic channels after 10 min incubation of the anti-HBV nanoprobe with a H<sub>2</sub>O<sub>2</sub> fuel solution at different concentrations. Most stable bubbles are counted at 6% H<sub>2</sub>O<sub>2</sub>. **d-e,** Fuel incubation times in the HBV (**d**) and HIV (**e**) assays. The final incubation times of nanoprobes and fuel were 20 min and 10 min, respectively, for all viruses (HBV, HCV, HIV, SARS-CoV-2).

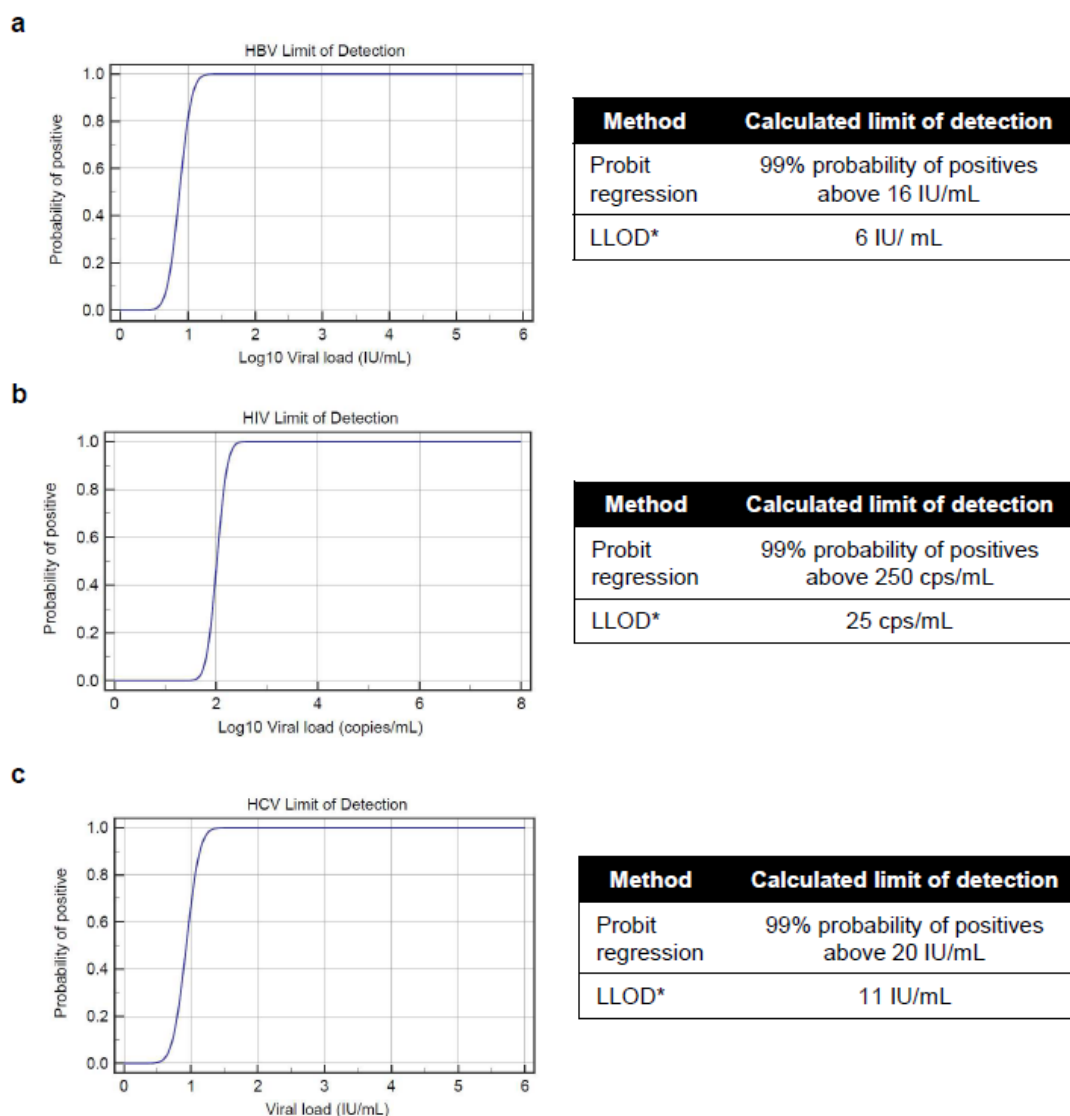

**Figure S6. Probit regression analysis for definition of the assay’s limits of detection. a-c,** Calculations of limits of detections for the three different intact virus detection assays (HBV, HIV, HCV). The probabilities of positive for given samples at each point of the sigmoid curves are shown. The number of virus-spiked samples used for these calculations were: HBV (n = 87); HIV (n = 83); HCV (n = 25). Lowest limit of detection (LLOD) were considered as the lowest values that could differentiate positive samples from the negative controls, considering the Limit of Blank (LOB), calculated according to (Robb et al., 2019)<sup>2</sup>.

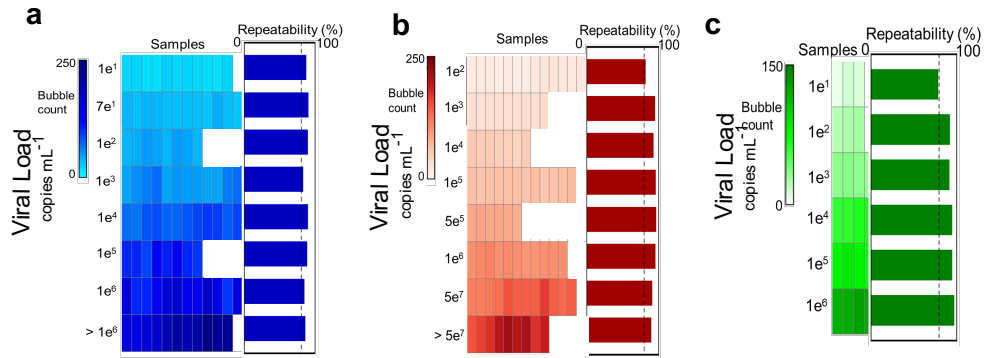

**Figure S7. Repeatability of the antigen detection assays for HBV, HIV, and HCV, at various viral concentrations.** Assay formats using microchips functionalized for capturing HBV (a), HIV (b), and HCV (c). Heatmaps show bubble counts obtained for individual samples, at various viral loads. Percentage coefficients of repeatability for each dilution are shown as bars. Vertical dashed lines mark 80.0%.

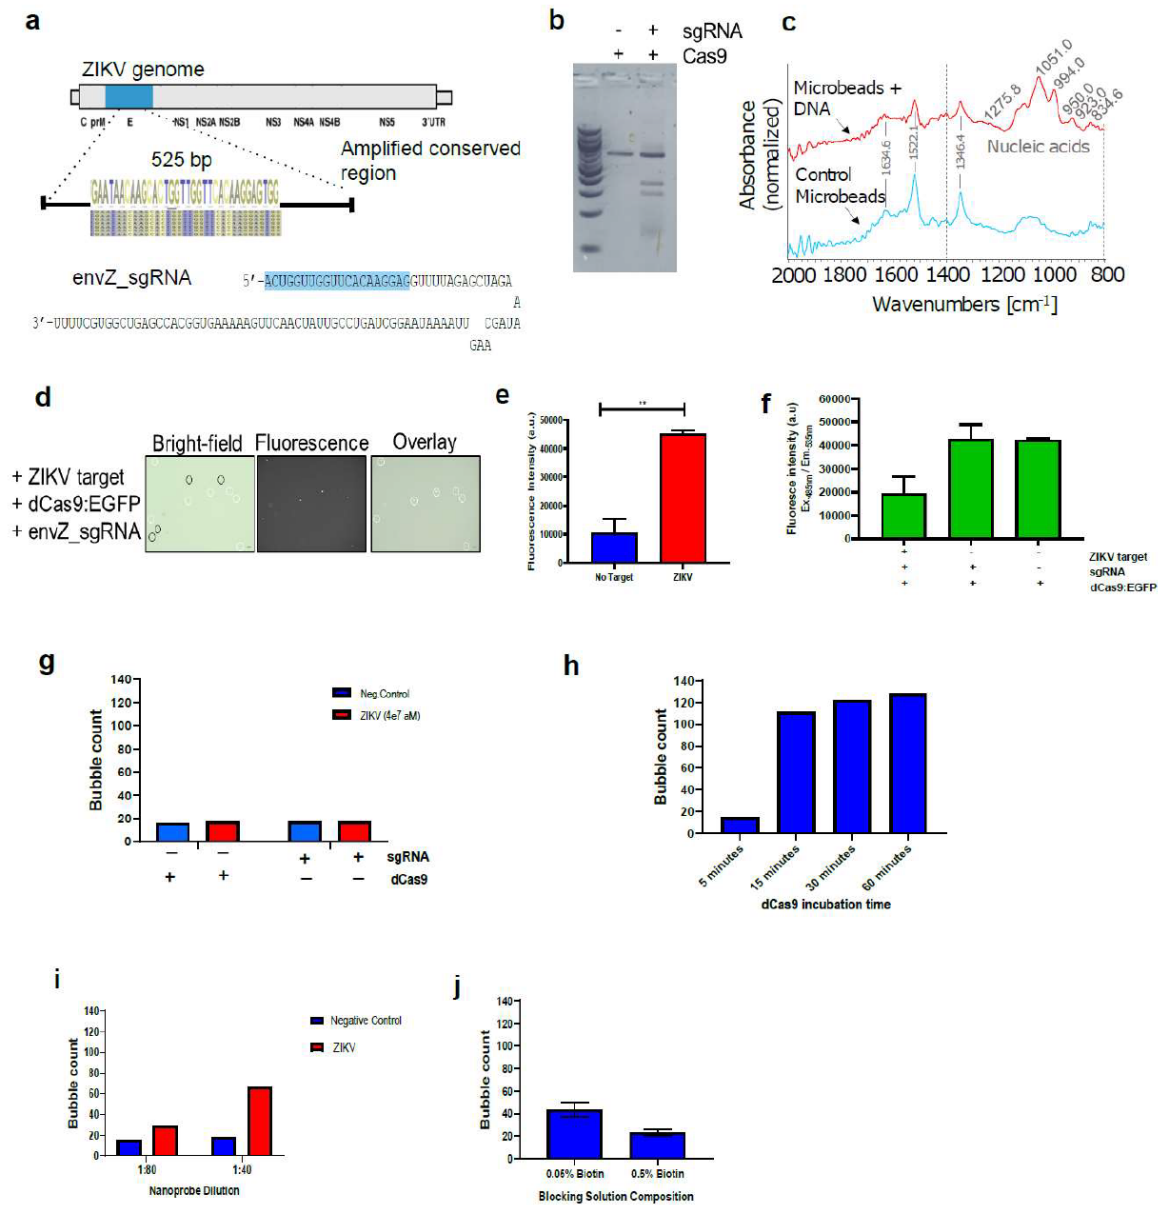

**Figure S8. Standardization of the CRISPR/dCas9-based nucleic acid detection assay.** **a**, We firstly designed a single guide RNA (envZ\_sgRNA) targeting a highly conserved region of the envelope protein-encoding sequence in the Zika virus (ZIKV) genome. We also designed biotinylated oligonucleotide primers aimed at generating biotin-modified amplified products after reverse-transcription PCR from the specific ZIKV genomic region. **b**, To confirm the specific recognition of the ZIKV env target region by Cas9 using the designed sgRNA (envZ\_sgRNA), a Cas9 nuclease assay using an enzymatically active form of the enzyme was performed using a

1:10:10 molar ratio of a target synthetic ZIKV DNA:sgRNA:Cas9. Only incubation with Cas9 in the presence of the designed envZ\_sgRNA can induce a specific cut of the target ZIKV synthetic sequence (672 bp), generating bands at 289 bp and 383 bp, then confirming the ability of the ribonucleoprotein complex to recognize the nucleic acid of interest. **c**, To confirm that the amplified biotin-modified synthetic fragment of ZIKV was efficiently immobilized in the microbeads, we performed FT-IR analysis of the microbeads after binding of the env\_Z biotinylated fragment, in comparison to control streptavidin-coated microbeads. There was a clear change in the FT-IR spectrum in the specific region where nucleic acid vibration groups are expected (mostly between 800cm<sup>-1</sup> and 1400 cm<sup>-1</sup>). Major absorption peaks appeared at around 1275, 1051, 950-1009, 923, and 834 cm<sup>-1</sup>, which correlates well with most intense absorption peaks found in various previous studies, including vibrations corresponding to C-O deoxyribose stretching, C-C and C-O deoxyribose skeletal motions of DNA, deoxyribose-phosphate, and markers of B-form DNA<sup>3,4</sup>. Particularly, the most intense peak at 1051.0 has been previously shown as a marker of DNA dehydration, what corroborates our finding as the DNA-coated microbeads where resuspended in ethanol and left to dry on the surface of the crystal. **d-f**, We evaluated the ability of dCas9 to specifically detect the amplified target of interest when immobilized in the streptavidin-microbeads. For this, we used an EGFP-coupled chimeric dCas9 enzyme and detected the green fluorescence in the DNA-coated beads by fluorescence microscopy (d) and fluorimetry (e-r). Incubation in the presence of the specific sgRNA generated microbeads with detectable fluorescence only when the target sequence was immobilized (d-e), and the fluorescence was excluded from the solution when a magnetic rack was used to precipitate the microbeads (f). **g-j**, To standardize the bubble signal generation and detection in the microfluidic channel, we tested different times of incubation with the complex dCas9:sgRNA, different compositions of blocking solutions and washing steps, different dilutions of the specific anti-Cas9 nanoprobe, and different concentrations of hydrogen peroxide in the fuel solution.

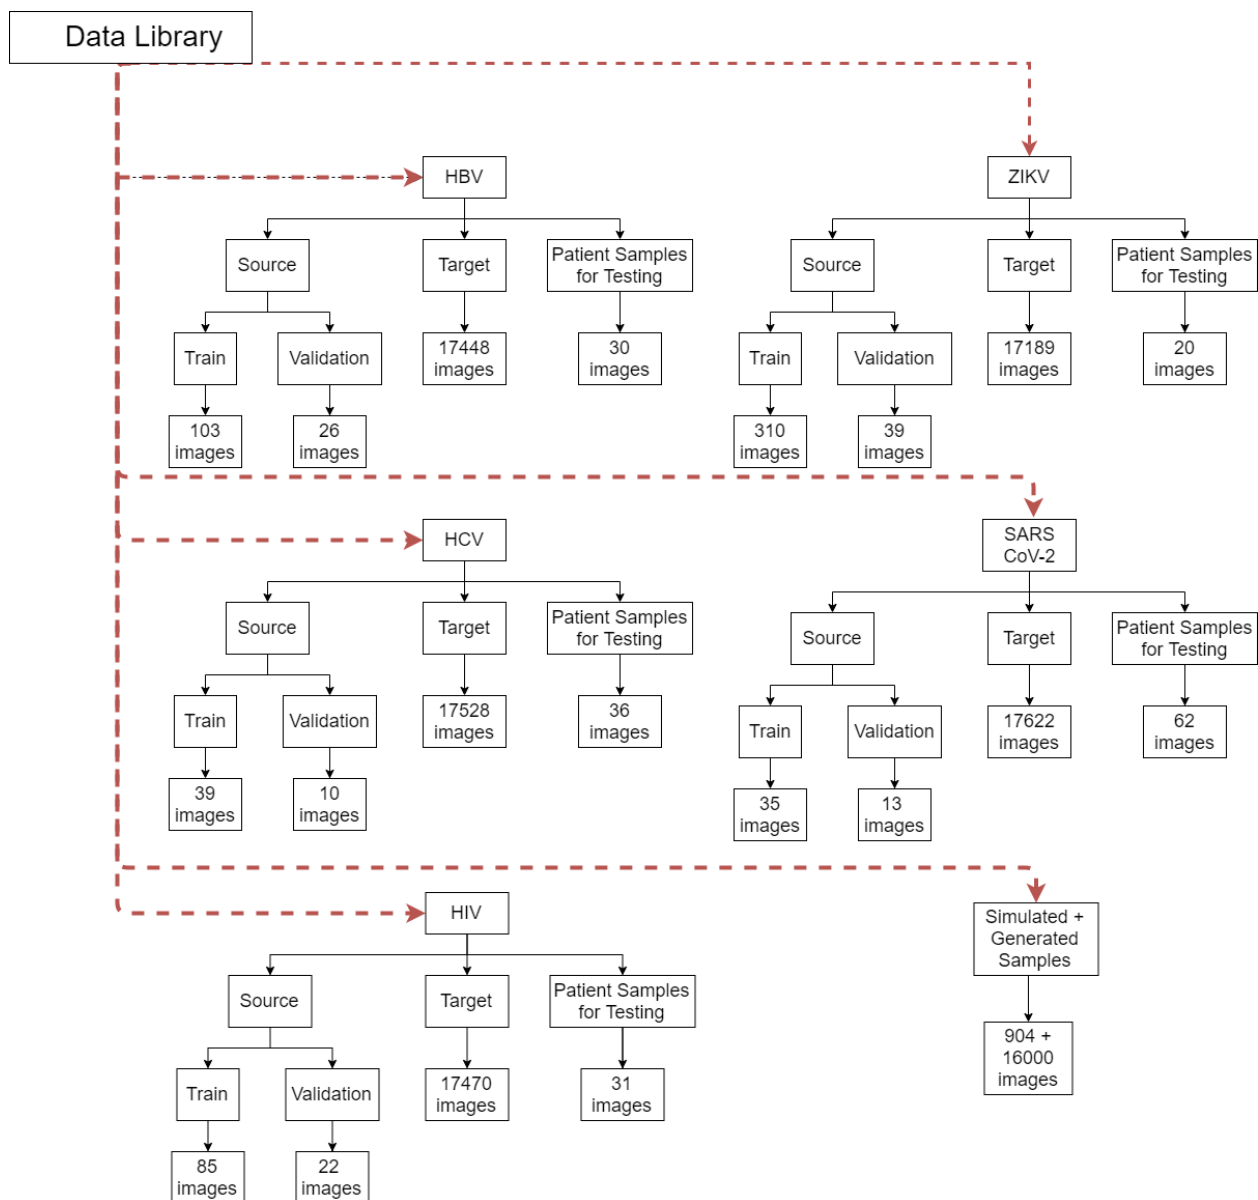

**Figure S9. Organization of the smartphone-taken microchip image dataset.** All specialist-annotated microchip images generated in the intact virus and nucleic acid detection assays were organized in five different domains – HBV (B), HIV (I), HCV (C), SARS-CoV-2 (C19), and ZIKV (Z) – alongside with a sixth domain containing unlabeled simulated samples (S). Flowchart showing the domain adaptation tasks. The five domains were sub-divided in *Source (SD)* domains (containing annotated image data for *Train* and *Validation* sets), and *Target (TD)* domains, containing unlabeled data with large feature distributions, encompassing bubbles of various shapes, sizes, concentrations and positions along the microfluidic channel. We followed standard protocols for domain adaptation in that we used all labeled source examples and all unlabeled target examples and performed five transfer learning tasks.

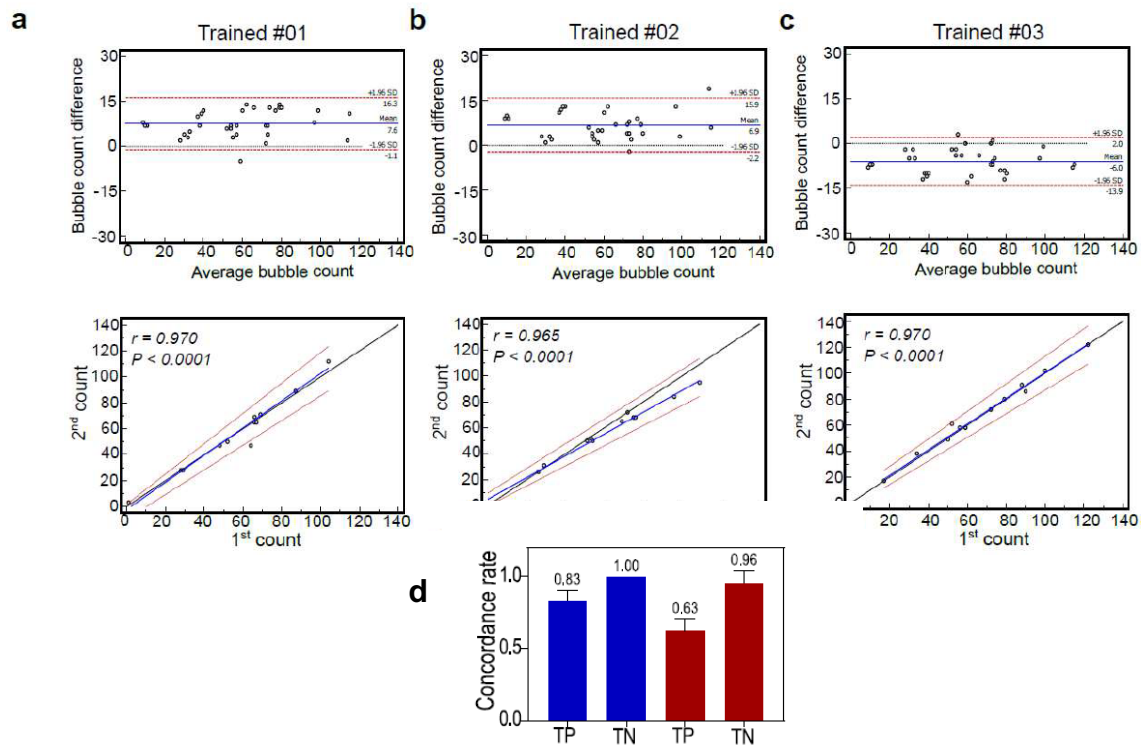

**Figure S10. Consistency of image classification by trained specialists and untrained individuals, using bubble counts. a-c (upper panels),** Bland-Altman plots comparing bubble counts obtained by each trained specialist ( $n = 3$ ), with a reference count obtained using ImageJ ( $n=48$ ). **a-c (lower panels),** Intra-rater consistency was blindly tested with repeat microchip images presented to the specialists during the test and then counts in the first and second measurements were compared by Passing-Bablok regression analysis. **d,** Untrained individuals ( $n = 4$ ) blindly rated microchip images as negative or positive ( $n = 36$ ). Blue and red represent microchips from different viruses (HBV or HIV). TP = true positives; TN = true negatives.

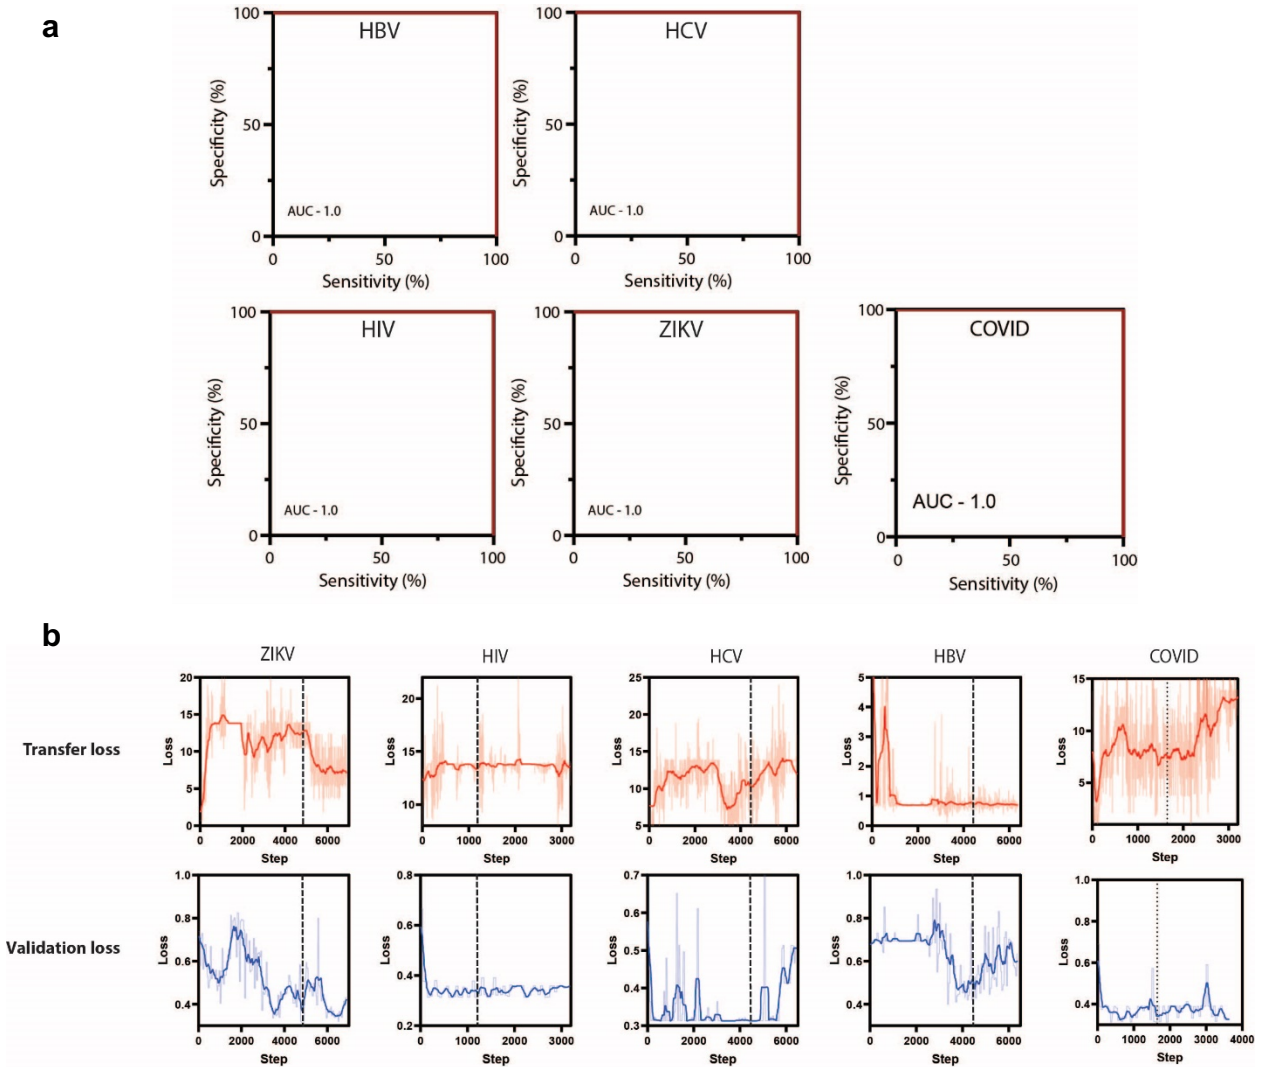

**Figure S11. Overall performance of the adversarial neural networks with conditioning-based image classifiers.** Receiver Operating Characteristic <sup>5</sup> curve analysis illustrating the separation capability of the adversarial network models based on the status of viral infection, using microchip-assay outcome images of patient samples. **b**, The transfer and validation loss curves of each adversarial model during the training cycle. Networks were saved at the lowest validation loss. The dotted lines indicate the saved model weights for each target.



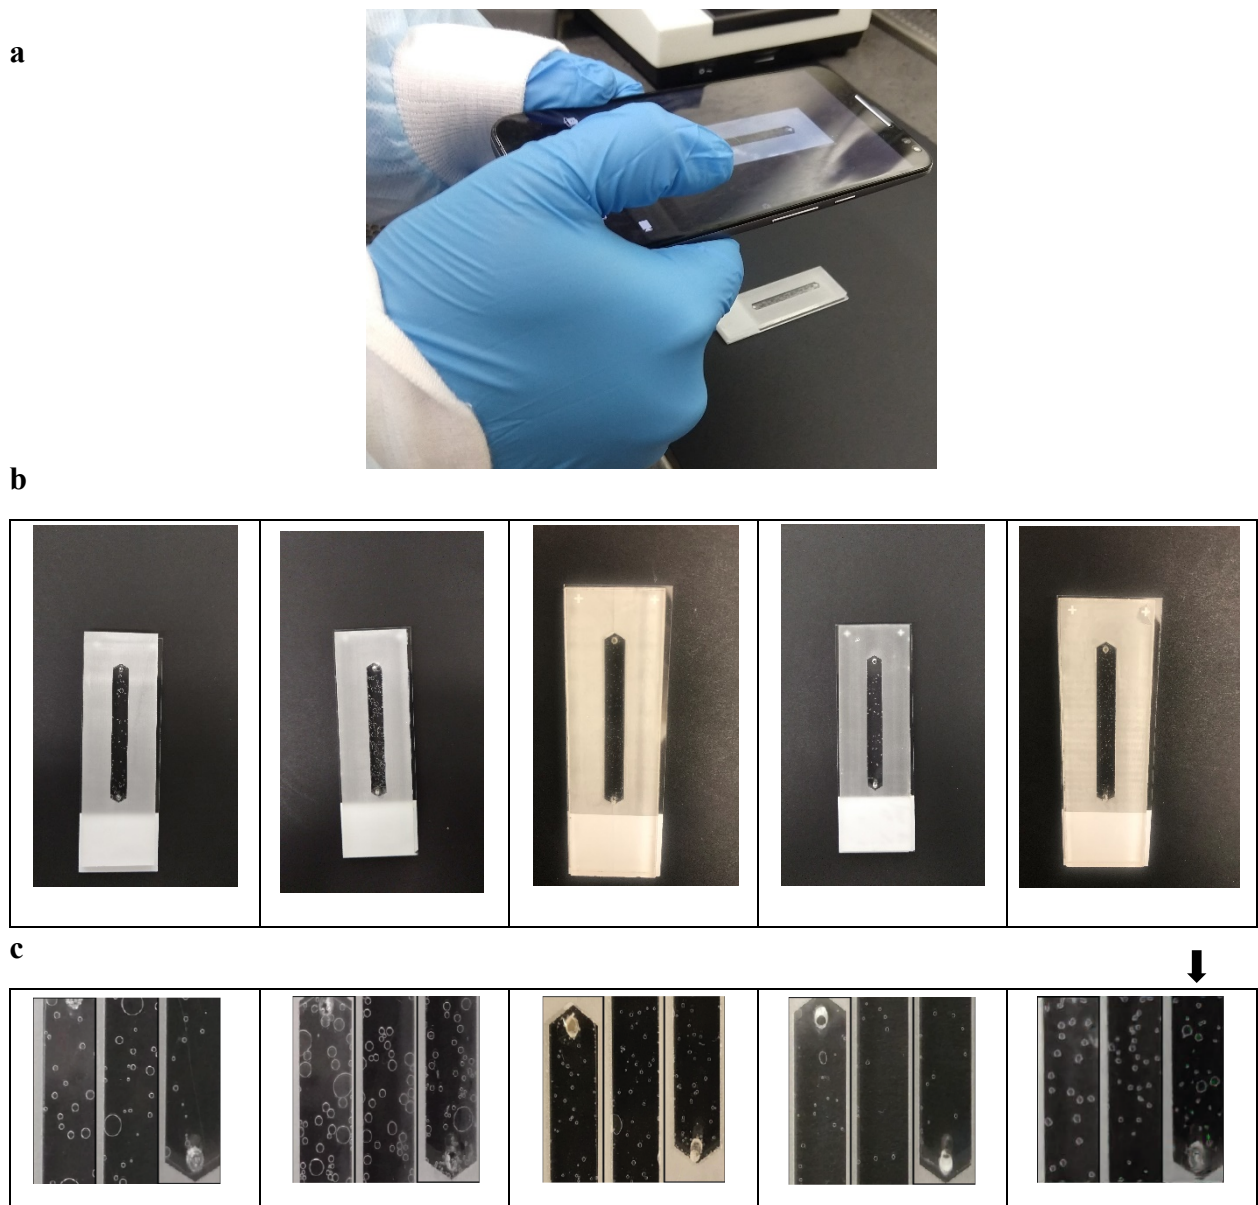

**Figure S12. The microchip imaging procedure and examples of the image library.** (a) Microchip imaging was done using the smartphone’s rear camera, under normal ambient lighting conditions. The cellphone was positioned at a distance so as to permit imaging of the entire microchannel, with sufficient visibility of the bubbles. No other particular condition was required. (b) Examples of the microchip image library, showing variable numbers and shapes of bubbles, ambient illumination conditions and image sizes. (c) Isolated microchip channels showing bubbles of different shapes and sizes. The arrow indicates an image synthetically generated using StyleGANs.

**Table S1. Overview of the performance of the adversarial neural networks with conditioning-based image classifiers.**

|                                    | <b>HBV</b>                      | <b>HIV</b>                      | <b>HCV</b>                      | <b>SARS-CoV-2</b>               | <b>ZIKV</b>                     |
|------------------------------------|---------------------------------|---------------------------------|---------------------------------|---------------------------------|---------------------------------|
| <b>Source images</b>               | n= 129                          | n= 107                          | n= 49                           | n= 48                           | n= 349                          |
| <b>Target images</b>               | n= 17,448                       | n= 17,470                       | n= 17,528                       | n= 17,622                       | n= 17,189                       |
| <b>Patient samples<sup>a</sup></b> | n= 30                           | n= 31                           | n= 36                           | n= 62                           | n= 20                           |
| <b>Sensitivity (%)</b>             | 100% (CI: 78.20% to 100.00%)    | 100.00% (CI: 80.49% to 100.00%) | 100.00% (CI: 83.89% to 100.00%) | 100.00% (CI: 87.66% to 100.00%) | 83.33% (CI: 51.59% to 97.91%)   |
| <b>Specificity (%)</b>             | 100% (CI: 78.20% to 100.00%)    | 100.00% (CI: 76.84% to 100.00%) | 100.00% (CI: 78.20% to 100.00%) | 100.00% (CI: 89.72% to 100.00%) | 100.00% (CI: 63.06% to 100.00%) |
| <b>Accuracy</b>                    | 100.00% (CI: 88.43% to 100.00%) | 100.00% (CI: 88.78% to 100.00%) | 100.00% (CI: 90.26% to 100.00%) | 100.00% (CI: 94.22% to 100.00%) | 90% (CI: 68.30% to 98.77%)      |
| <b>PPV</b>                         | 100%                            | 100.00%                         | 100.00%                         | 100.00%                         | 100.00%                         |
| <b>NPV</b>                         | 100%                            | 100.00%                         | 100.00%                         | 100.00%                         | 80% (CI: 53.02% to 93.41%)      |

<sup>a</sup> These numbers refer to the total numbers of patient samples tested in each assay format (including positive and negative samples). For the exact numbers of patient samples that are specifically positive of each virus, please see Table S3.

**Table S2. Comparison of SPyDERMAN with CDC qRT-PCR assay for the detection of SARS-CoV-2.**

|                                       | <b>SPyDERMAN</b>                                                                                                                                                                                                                          | <b>CDC qRT-PCR</b>                                                                                                                              |
|---------------------------------------|-------------------------------------------------------------------------------------------------------------------------------------------------------------------------------------------------------------------------------------------|-------------------------------------------------------------------------------------------------------------------------------------------------|
| <b>Target</b>                         | Intact virus – spike protein                                                                                                                                                                                                              | N gene (N1, N2, and N3)                                                                                                                         |
| <b>LoD</b>                            | 1000 copies/ml                                                                                                                                                                                                                            | 1000 copies/ml                                                                                                                                  |
| <b>Assay sample-to-result time</b>    | 75 minutes                                                                                                                                                                                                                                | 4 h including RNA extraction                                                                                                                    |
| <b>Assay results</b>                  | Qualitative                                                                                                                                                                                                                               | Quantitative                                                                                                                                    |
| <b>Assay components</b>               | On-chip virus capture (45 min at room temperature), Labeling captured viruses using PtNPs (20 min at room temperature), Bubble formation (10 min at room temperature), and optical signal read out and analysis using a cellphone camera. | UDG digestion (25 °C, 2 min), reverse transcription (50 °C, 15 min), denature (95 °C, 2 min) amplification, (95 °C, 3 s; 55 °C 30 s; 45 cycles) |
| <b>Bulky instrumentation required</b> | No                                                                                                                                                                                                                                        | Yes                                                                                                                                             |

**Table S3. Detailed information about the patient samples used in this study.**

| <b>HBV patient samples</b> |                   |               |               |                                   |                                  |
|----------------------------|-------------------|---------------|---------------|-----------------------------------|----------------------------------|
| <b>Sample #</b>            | <b>Donor code</b> | <b>Gender</b> | <b>Origin</b> | <b>Additional characteristics</b> | <b>Viral Load (IU/mL) (qPCR)</b> |
| 1                          | KH19-086977       | N/A           | USA           |                                   | 4,383,293                        |
| 2                          | DLS17-038198      | N/A           | France        | HBV: Genotype C                   | 1,069,373                        |
| 3                          | DLS17-038199      | N/A           | France        | HBV: Genotype C                   | 8,407,621                        |
| 4                          | DLS17-038201      | N/A           | France        | HBV: Genotype D                   | 88,167,700                       |
| 5                          | DLS13-01425       | N/A           | Vietnam       | HBV: Genotype B                   | 441,000                          |
| 6                          | DLS14-06861       | N/A           | Vietnam       | HBV: Genotype B   C               | 1,280,000                        |
| 7                          | DLS14-06862       | N/A           | Vietnam       |                                   | 176,599                          |
| 8                          | KH18-55281        | N/A           | USA           |                                   | 23                               |
| 9                          | KH19-078194       | N/A           | USA           |                                   | 143                              |
| 10                         | DLS17-038205      | N/A           | France        | HBV: Genotype C                   | >110,000,000                     |
| 11                         | DLS17-038211      | N/A           | France        | HBV: Genotype F                   | 192                              |

|    |              |     |         |                 |            |
|----|--------------|-----|---------|-----------------|------------|
| 12 | DLS17-038212 | N/A | France  | HBV: Genotype E | 7,199,505  |
| 13 | DLS17-038209 | N/A | France  | HBV: Genotype D | 13,961,137 |
| 14 | DLS14-07957  | N/A | Vietnam | HBV: Genotype B | 2,960,000  |
| 15 | DLS14-07958  | N/A | Vietnam | HBV: Genotype B | 3,490,000  |
| 16 | DLS14-07959  | N/A | Vietnam |                 | 341,051    |
| 17 | DLS14-07961  | N/A | Vietnam | HBV: Genotype B | 27,200     |
| 18 | DLS14-07963  | N/A | Vietnam | HBV: Genotype B | 10,200,000 |

---

**HCV patient samples**

---

| <b>Sample #</b> | <b>Donor code</b> | <b>Gender</b> | <b>Origin</b> | <b>Additional characteristics</b> | <b>Viral Load (IU/mL) (qPCR)</b> |
|-----------------|-------------------|---------------|---------------|-----------------------------------|----------------------------------|
| 1               | LDR0113           | M             | N/A           | N/A                               | 3,280                            |
| 2               | LDR0072           | M             | N/A           | N/A                               | 5,420                            |
| 3               | LDR0077           | F             | N/A           | N/A                               | 15,000                           |
| 4               | LDR0137           | M             | N/A           | N/A                               | 113,000                          |
| 5               | LDR0021           | F             | N/A           | N/A                               | 164,000                          |
| 6               | LDR0027           | F             | N/A           | N/A                               | 193,000                          |
| 7               | LDR0050           | F             | N/A           | N/A                               | 202,000                          |
| 8               | LDR0087           | F             | N/A           | N/A                               | 230,000                          |
| 9               | LDR010            | M             | N/A           | N/A                               | 248,000                          |
| 10              | LDR0074           | F             | N/A           | N/A                               | 491,000                          |
| 11              | LDR0101           | M             | N/A           | N/A                               | 506,000                          |
| 12              | LDR0013           | F             | N/A           | N/A                               | 868,000                          |
| 13              | LDR0122           | F             | N/A           | N/A                               | 1,020,000                        |
| 14              | LDR0120           | M             | N/A           | N/A                               | 1,040,000                        |
| 15              | LDR0140           | F             | N/A           | N/A                               | 4,470,000                        |
| 16              | LDR0100           | M             | N/A           | N/A                               | 4,610,000                        |
| 17              | LDR0104           | M             | N/A           | N/A                               | 5,880,000                        |
| 18              | LDR0039           | F             | N/A           | N/A                               | 6,020,000                        |
| 19              | LDR0026           | F             | N/A           | N/A                               | 26,700                           |
| 20              | LDR0180           | M             | N/A           | N/A                               | 875,000                          |
| 21              | LDR0090           | M             | N/A           | N/A                               | 670,000                          |

---

| <b>HIV patient samples</b> |                   |               |               |                                   |                                   |
|----------------------------|-------------------|---------------|---------------|-----------------------------------|-----------------------------------|
| <b>Sample #</b>            | <b>Donor code</b> | <b>Gender</b> | <b>Origen</b> | <b>Additional characteristics</b> | <b>Viral Load (cps/mL) (qPCR)</b> |
| 1                          | DLS0054630        | N/A           | USA           | N/A                               | 18,060                            |
| 2                          | DLS0054640        | N/A           | USA           | N/A                               | 700                               |
| 3                          | DLS0054641        | N/A           | USA           | N/A                               | 4,377                             |
| 4                          | DLS0056261-S      | N/A           | USA           | N/A                               | 1,420                             |
| 5                          | DLS0056264-S      | N/A           | USA           | N/A                               | 2,950                             |
| 6                          | DLS0056266-S      | N/A           | USA           | N/A                               | 21,660                            |
| 7                          | DLS0056272-S      | N/A           | USA           | N/A                               | 75,900                            |
| 8                          | DLS0116319        | N/A           | USA           | N/A                               | 535,000                           |
| 9                          | DLS0116321        | N/A           | USA           | N/A                               | 2,590,000                         |
| 10                         | DLS13-11694       | N/A           | France        | N/A                               | 759                               |
| 11                         | DLS0056269-S      | N/A           | France        | N/A                               | 32,070                            |
| 12                         | DLS13-11720       | N/A           | France        | N/A                               | 8,245                             |
| 13                         | DLS13-11721       | N/A           | France        | N/A                               | 16,112                            |
| 14                         | DLS13-11728       | N/A           | France        | N/A                               | 6,565                             |
| 15                         | DLS13-11729       | N/A           | France        | N/A                               | 10,657                            |
| 16                         | DLS13-11731       | N/A           | France        | N/A                               | 27,326                            |
| 17                         | DLS16-34350       | N/A           | USA           | N/A                               | 11,010                            |
| 18                         | DLS16-34353       | N/A           | USA           | N/A                               | 5,520                             |
| 19                         | DLS16-34363       | N/A           | USA           | N/A                               | 18,610                            |

| <b>SARS-CoV-2 patient samples</b> |                   |               |               |                                   |                                   |
|-----------------------------------|-------------------|---------------|---------------|-----------------------------------|-----------------------------------|
| <b>Sample #</b>                   | <b>Donor code</b> | <b>Gender</b> | <b>Origen</b> | <b>Additional characteristics</b> | <b>Viral Load (cps/mL) (qPCR)</b> |
| 1                                 | S00552266         | N/A           | N/A           | N/A                               | 187                               |
| 2                                 | S00552268         | N/A           | N/A           | N/A                               | 546,000,000                       |
| 3                                 | S00552269         | N/A           | N/A           | N/A                               | 490,000,000                       |
| 4                                 | S00552270         | N/A           | N/A           | N/A                               | 655                               |
| 5                                 | S00552271         | N/A           | N/A           | N/A                               | 9,110,000                         |
| 6                                 | S00552273         | N/A           | N/A           | N/A                               | 14,968,839                        |
| 7                                 | S00552274         | N/A           | N/A           | N/A                               | 1192                              |
| 8                                 | S00552275         | N/A           | N/A           | N/A                               | 28,554                            |
| 9                                 | S00552275         | N/A           | N/A           | N/A                               | 47,489,198                        |

|    |              |     |     |                                                                       |             |
|----|--------------|-----|-----|-----------------------------------------------------------------------|-------------|
| 10 | S00552276    | N/A | N/A | N/A                                                                   | 12,085      |
| 11 | S00552277    | N/A | N/A | N/A                                                                   | 1,485       |
| 12 | S00552278    | N/A | N/A | N/A                                                                   | 1,072,463   |
| 13 | S00552279    | N/A | N/A | N/A                                                                   | 229,851,399 |
| 14 | S00552280    | N/A | N/A | N/A                                                                   | 427,999     |
| 15 | S00552281    | N/A | N/A | N/A                                                                   | 52          |
| 16 | S00552282    | N/A | N/A | N/A                                                                   | 87,700,000  |
| 17 | S00552283    | N/A | N/A | N/A                                                                   | 142,000,000 |
| 18 | S00552284    | N/A | N/A | N/A                                                                   | 17,200,000  |
| 19 | S00552285    | N/A | N/A | N/A                                                                   | 332,000,000 |
| 20 | S00552286    | N/A | N/A | N/A                                                                   | 46,300,000  |
| 21 | S00552287    | N/A | N/A | N/A                                                                   | 282,000,000 |
| 22 | S00552288    | N/A | N/A | N/A                                                                   | 26,800,000  |
| 23 | S00552289    | N/A | N/A | N/A                                                                   | 161,000,000 |
| 24 | S00552291    | N/A | N/A | N/A                                                                   | 436,000,000 |
| 25 | S00552292    | N/A | N/A | N/A                                                                   | 348         |
| 26 | S00552293    | N/A | N/A | N/A                                                                   | 750,000,000 |
| 27 | S00552294    | N/A | N/A | N/A                                                                   | 90,400,000  |
| 28 | S00552295    | N/A | N/A | N/A                                                                   | 274,000     |
| 29 | S000552276-1 | N/A | N/A | Diluted sample<br>of S00552276 –<br>used for assay<br>standardization | 3,000       |
| 30 | S000552276-2 | N/A | N/A | Diluted sample<br>of S00552276 -<br>used for assay<br>standardization | 3,000       |
| 31 | S000552276-3 | N/A | N/A | Diluted sample<br>of S00552276 -<br>used for assay<br>standardization | 3,000       |
| 32 | S000552276-4 | N/A | N/A | Diluted sample<br>of S00552276 -<br>used for assay<br>standardization | 3,000       |
| 33 | S000552276-5 | N/A | N/A | Diluted sample<br>of S00552276 -<br>used for assay<br>standardization | 5,000       |

|    |                         |     |     |                                                                       |                     |
|----|-------------------------|-----|-----|-----------------------------------------------------------------------|---------------------|
| 34 | S000552274-1            | N/A | N/A | Diluted sample<br>of S00552274 -<br>used for assay<br>standardization | 5,000               |
| 35 | S000551975              | N/A | N/A | N/A                                                                   | Negative            |
| 36 | S000551976              | N/A | N/A | N/A                                                                   | Negative            |
| 37 | S000551977              | N/A | N/A | N/A                                                                   | Negative            |
| 38 | S000551978              | N/A | N/A | N/A                                                                   | Negative            |
| 39 | S000551979              | N/A | N/A | N/A                                                                   | Negative            |
| 40 | S000551980              | N/A | N/A | N/A                                                                   | Negative            |
| 41 | S000551981              | N/A | N/A | N/A                                                                   | Negative            |
| 42 | S000551982              | N/A | N/A | N/A                                                                   | Negative            |
| 43 | S000551983              | N/A | N/A | N/A                                                                   | Negative            |
| 44 | S000551984              | N/A | N/A | N/A                                                                   | Negative            |
| 45 | S000551985              | N/A | N/A | N/A                                                                   | Negative            |
| 46 | S000551986              | N/A | N/A | N/A                                                                   | Negative            |
| 47 | S000551987              | N/A | N/A | N/A                                                                   | Negative            |
| 48 | S000551988              | N/A | N/A | N/A                                                                   | Negative            |
| 49 | S000551989              | N/A | N/A | N/A                                                                   | Negative            |
| 50 | S000551990              | N/A | N/A | N/A                                                                   | Negative            |
| 51 | S000551991              | N/A | N/A | N/A                                                                   | Negative            |
| 52 | S000551992              | N/A | N/A | N/A                                                                   | Negative            |
| 53 | S000551993              | N/A | N/A | N/A                                                                   | Negative            |
| 54 | S000551994              | N/A | N/A | N/A                                                                   | Negative            |
| 55 | S000551995              | N/A | N/A | N/A                                                                   | Negative            |
| 56 | S000551996              | N/A | N/A | N/A                                                                   | Negative            |
| 57 | S000551997              | N/A | N/A | N/A                                                                   | Negative            |
| 58 | S000551998              | N/A | N/A | N/A                                                                   | Negative            |
| 59 | S000551999              | N/A | N/A | N/A                                                                   | Negative            |
| 60 | S000552000              | N/A | N/A | N/A                                                                   | Negative            |
| 61 | S000552001              | N/A | N/A | N/A                                                                   | Negative            |
| 62 | S000552002              | N/A | N/A | N/A                                                                   | Negative            |
| 63 | S000552003              | N/A | N/A | N/A                                                                   | Negative            |
| 64 | S000552004              | N/A | N/A | N/A                                                                   | Negative            |
| 65 | AI900387949032220D<br>D | N/A | N/A | N/A                                                                   | Influenza B<br>swab |
| 66 | AI900384151031120D<br>D | N/A | N/A | N/A                                                                   | Influenza B<br>swab |
| 67 | AI900387954032020D<br>D | N/A | N/A | N/A                                                                   | Influenza A<br>swab |
| 68 | AI900387955031920D<br>D | N/A | N/A | N/A                                                                   | Influenza A<br>swab |

| <b>ZIKV patient samples</b> |                   |               |                    |                                   |                               |
|-----------------------------|-------------------|---------------|--------------------|-----------------------------------|-------------------------------|
| <b>Sample #</b>             | <b>Donor code</b> | <b>Gender</b> | <b>Origen</b>      | <b>Additional characteristics</b> | <b>Viral Load (Ct) (qPCR)</b> |
| 1                           | D000011743        | F             | Dominican Republic | Aptima Zika Virus Assay (0)       | Not detected                  |
| 2                           | D000011752        | F             | Dominican Republic | Aptima Zika Virus Assay (0)       | Not detected                  |
| 3                           | D000013839        | F             | Dominican Republic | Aptima Zika Virus Assay (33.74)   | Medium VL                     |
| 4                           | D000010409        | M             | Dominican Republic | Aptima Zika Virus Assay (0)       | Medium VL                     |
| 5                           | D000012068        | F             | Dominican Republic | Aptima Zika Virus Assay (33.2)    | Medium VL                     |
| 6                           | D000011942        | M             | Dominican Republic | Aptima Zika Virus Assay (31.93)   | High VL                       |

**Table S4. List of antibodies, oligonucleotides, and synthetic nucleic acids used in this study**

| <b>1. Antibodies</b>       |                                                     |                                 |                                         |                                                     |
|----------------------------|-----------------------------------------------------|---------------------------------|-----------------------------------------|-----------------------------------------------------|
| <b>Name</b>                | <b>Target</b>                                       | <b>Characteristics</b>          | <b>Used in:</b>                         | <b>Provider</b>                                     |
| anti-HBV                   | HBV surface antigen (HBsAg)                         | B521M monoclonal antibody (mAb) | HBV intact virus detection assay        | Genetex, cat. no. GTX41736                          |
| Anti-HCV                   | HCV core antigen (HCV cAg)                          | 6A1 mAb                         | HCV intact virus detection assay        | Abcam, cat. no. ab2582                              |
| Anti-HIV1 (1)              | HIV envelope glycoprotein (gp120)                   | 2557 mAb                        | HIV intact virus detection assay        | NIH AIDS Reagent Program, cat. no. 13429            |
| Anti-HIV1 (2)              | HIV envelope glycoprotein (gp120)                   | goat anti-HIV1 gp120 pAb        | HIV intact virus detection assay        | Abcam, cat. no. ab21179                             |
| Anti-SARS-CoV-2            | SARS-CoV-2 (2019-nCoV) Spike S1 Antibody            | Rabbit MAb                      | SARS-COV-2 intact virus detection assay | Sino Biological, cat. no. 40150-R007                |
| anti-Cas9 mAb              | CRISPR associated protein 9 from <i>S. pyogenes</i> | Cas9 mAb                        | CRISPR/dCas9 detection assay            | Applied Biological Materials, abm, cat. no. Y300079 |
| <b>2. Oligonucleotides</b> |                                                     |                                 |                                         |                                                     |
| <b>Name</b>                | <b>Sequence (5' – 3')</b>                           | <b>Characteristics</b>          | <b>Used in:</b>                         | <b>Provider</b>                                     |



|       |                             |                     |                                                   |                  |
|-------|-----------------------------|---------------------|---------------------------------------------------|------------------|
| ZK_F  | TGCTGTCAGTTCATGGCTCC        | 20-mer; 5' – Biotin | Amplification of conserved ZIKV <i>env</i> region | IDT Technologies |
| ZK_R  | TGAATGTGAACGCTGCGGTA        | 20-mer; 5' – Biotin | Amplification of conserved ZIKV <i>env</i> region | IDT Technologies |
| DEN_F | GTGACATTTAAAACAGCTCAT<br>GC | 23-mer; 5' – Biotin | Amplification of conserved DENV <i>env</i> region | IDT Technologies |
| DEN_R | CTTTCACCAAAGGGCGGTTCC       | 20-mer; 5' – Biotin | Amplification of conserved DENV <i>env</i> region | IDT Technologies |

### 3. Synthetic DNA fragments

| Name         | Sequence (5' – 3')                                                                                                                                                                                                                                                                                                                                                                                                                                                                                                                                                                                                                                                                                                                                    | Characteristics                                   | Used in:                                    | Provider         |
|--------------|-------------------------------------------------------------------------------------------------------------------------------------------------------------------------------------------------------------------------------------------------------------------------------------------------------------------------------------------------------------------------------------------------------------------------------------------------------------------------------------------------------------------------------------------------------------------------------------------------------------------------------------------------------------------------------------------------------------------------------------------------------|---------------------------------------------------|---------------------------------------------|------------------|
| <i>env_Z</i> | GTGACATGCGCTAAGTTTGCA<br>TGCTCCAAGAAAATGACCGG<br>GAAGAGCATCCAGCCAGAGA<br>ATCTGGAGTACCGGATAATGC<br>TGTCAGTTCATGGCTCCCAGC<br>ACAGTGGGATGATCGTTAATG<br>ACACAGGACATGAAACTGATG<br>AGAATAGAGCGAAGGTTGAG<br>A<br>TAACGCCCAATTCACCAAGAG<br>CCGAAGCCACCCTGGGGGGTT<br>TTGGAAGCCTAGGACTTGATT<br>GTGAACCGAGGACAGGCCTTG<br>ACTTTTCAGATTTGTATTACTT<br>GACTATGAATAACAAGCACTG<br>GTTGGTTCACAAGGAGTGGTT<br>CCACGACATTCCATTACCTTG<br>GCACGCTGGGGCAGACACCGG<br>AACTCCACACTGGAACAACAA<br>AGAAGCACTGGTAGAGTTCAA<br>GGACGCACATGCCAAAAGGCA<br>AACTGTCGTGGTTCTAGGGAG<br>TCAAGAAGGAGCAGTTCACAC<br>GGCCCTTGCTGGAGCTCTGGA<br>GGCTGAGATGGATGGTGCAAA<br>GGGAAGGCTGTCCTCTGGCCA<br>CTTGAAATGTCGCCTGAAAAT<br>GGATAAACTTAGATTGAAGGG<br>CGTGTCATACTCCTTGTGTACC<br>GCAGCGTTCACATTCACCAAG | Conserved portion of the ZIKV Env-encoding region | Standardization of CRISPR/dCas9 based assay | IDT Technologies |

|      |                                                                                                                                                                                                                                                                                                                                                                                                                                                                                                                                                |                                                             |                                                      |                     |
|------|------------------------------------------------------------------------------------------------------------------------------------------------------------------------------------------------------------------------------------------------------------------------------------------------------------------------------------------------------------------------------------------------------------------------------------------------------------------------------------------------------------------------------------------------|-------------------------------------------------------------|------------------------------------------------------|---------------------|
|      | ATCCCGGCTGAAACACTGCAC<br>GGGACAGTCACAGTGGAGGTA<br>CAGTACGCAGGGACAGATGGA                                                                                                                                                                                                                                                                                                                                                                                                                                                                        |                                                             |                                                      |                     |
| DEN1 | AGACAAGATTTGCTGGTGACA<br>TTTAAAACAGCTCATGCAAAG<br>AAGCAAGAAGTAGTCGTA<br>GGATCACAAGAAGGAGCAAT<br>GCACACTGCGCTGACCGGAGC<br>GACGGAAATCCAAACGTCTGG<br>AACGACAACAATTTTTGCAGG<br>ACACTTGAAATGTAGACTAAA<br>GATGGACAAACTGACTCTAAA<br>AGGGATGTCATATGTGATGTG<br>CACAGGCTCATTCAAGCTAGA<br>GAAAGAAGTGGCTGAGACCCA<br>GCATGGAACCGTTCTAGTGCA<br>GATCAAATACGAAGGAACAG<br>ATGCACCATGCAAGATTCCTT<br>TTTCGACCCAAGATGAAAAAG<br>GAGTAACCCAGAATGGGAGAT<br>TGATAACAGCCAACCCCATAG<br>TCACTGATAAAGAAAAACCAG<br>TCAACATTGAGGCAGAACCGC<br>CTTTTGGTGAAAGTTACATCGT<br>GATAG | Conserved<br>portion of the<br>DENV Env-<br>encoding region | Standardization<br>of<br>CRISPR/dCas9<br>based assay | IDT<br>Technologies |
| DEN2 | AGAAAGAAATGCTAGTAACAT<br>TCAAAAACCCCATGCGAAAA<br>GACAAGACGTTGTCTTGG<br>GATCGCAAGAGGGCGCCATGC<br>ACACAGCACTCACAGGCCGGC<br>AACAGAAATTCAGATGTCATC<br>GGGAAATATACTATTTATGGG<br>GCATTTGAAGTGTAGACTGAG<br>GATGGACAAGCTGCAACTCAA<br>AGGGATGTCGTA<br>TCCATGTG<br>CACAGGAAAGTTCAAAGTTGT<br>CAAAGAAATAGCAGAAACAC<br>AACATGGAACGATAGTCATCA<br>GAGTGCAGTATGAAGGAGAA<br>GACTCACCGTGCAAGATCCCT<br>TTTGAGATCATGGACTTGGAA<br>AAGAAACATGTCTTAGGGCGA<br>CTGATTACGGTCAACCCAATA<br>GTGATAGGGAAAGACAGCCCA<br>ATCAACATAGAAGCAGAACCT                                  | Conserved<br>portion of the<br>DENV Env-<br>encoding region | Standardization<br>of<br>CRISPR/dCas9<br>based assay | IDT<br>Technologies |

|      |                                                                                                                                                                                                                                                                                                                                                                                                                                                                                                                                                     |                                                             |                                                      |                     |
|------|-----------------------------------------------------------------------------------------------------------------------------------------------------------------------------------------------------------------------------------------------------------------------------------------------------------------------------------------------------------------------------------------------------------------------------------------------------------------------------------------------------------------------------------------------------|-------------------------------------------------------------|------------------------------------------------------|---------------------|
|      | CCTTTTGGTGACAGCTATATTG<br>TCATA                                                                                                                                                                                                                                                                                                                                                                                                                                                                                                                     |                                                             |                                                      |                     |
| DEN3 | AGGAAGGAGCTTCTTGTGACA<br>TTCAAAACGCACATGCGAAA<br>AAACAAGAAGTAGTTGTCCTT<br>GGATCGCAAGAGGGAGCAAT<br>GCATACAGCACTGACAGGAGC<br>CACAGAAATCCAAAACCTCAGG<br>AGGCACAAGCATT TTTGCGGG<br>GCACTTAAAATGTAGACTTAA<br>GATGGACAAATTGGAAC TCAA<br>GGGGATGAGCTATGCAATGTG<br>CACGAATACCTTTGTGTTGAA<br>GAAAGAAGTCTCAGAAACGCA<br>GCATGGGACAATACTCGTTAA<br>AGTCGAGTACAAAGGGGAAG<br>ATGCACCTTGCAAGATTCCTTT<br>CTCCACAGAGGATGGACAAGG<br>GAAAGCTCACAATGGCAGACT<br>GATCACAGCCAACCCAGTGGT<br>GACTAAGAAGGAGGAGCCTGT<br>CAATATTGAGGCTGAACCTCC<br>TTTTGGGGAAAGTAATATAGT<br>AATTG | Conserved<br>portion of the<br>DENV Env-<br>encoding region | Standardization<br>of<br>CRISPR/dCas9<br>based assay | IDT<br>Technologies |
| DEN4 | ATAAAGAGAGAATGGTGACAT<br>TCAAGGTTCTCATGCCCAAG<br>AGACAGGATGTGACAGTGCTA<br>GGATCTCAGGAGGGAGCTATG<br>CATTCTGCCCTCGCCGGAGCC<br>ACAGAAGTAGATTCTGGTGAT<br>GGAAATCACATGTTTGCAGGA<br>CATCTCAAGTGCAAAGTCCGC<br>ATGGAGAAATTGAGAAT TAAA<br>GGAATGTCATACACGATGTGT<br>TCAGGAAAGTTCTCAATTGAC<br>AAAGAGATGGCAGAAACACA<br>G<br>CATGGAACTACAGTGGTGAAA<br>GTCAAGTATGAAGGCGCTGGA<br>GCTCCGTGTAAAGTCCCCATA<br>GAGATAAGAGATGTGAACAA<br>GGAAAAAGTGGTCGGACGTAT<br>CATCTCATCTACCCCTTTGCT<br>GAGAATACCAACAGCGTAACC<br>AACATAGAATTAGAACCCCT                                  | Conserved<br>portion of the<br>DENV Env-<br>encoding region | Standardization<br>of<br>CRISPR/dCas9<br>based assay | IDT<br>Technologies |

|                 | TTTGGGGACAGCTACATAGTG<br>ATAG                |                        |                                                                 |                  |
|-----------------|----------------------------------------------|------------------------|-----------------------------------------------------------------|------------------|
| <b>4. sgRNA</b> |                                              |                        |                                                                 |                  |
| <b>Name</b>     | <b>crRNA sequence, without PAM (5' – 3')</b> | <b>Characteristics</b> | <b>Used in:</b>                                                 | <b>Provider</b>  |
| Env_sgRNA       | ACTGGTTGGTTCACAAGGAG                         | Single molecule sgRNA. | CRISPR/Cas9 mediated detection of amplified ZIKV genomic region | IDT Technologies |

#### References used in the supplementary information:

- 1 Li, Y.; Schellhorn, H. E. Rapid Kinetic Microassay for Catalase Activity. *J. Biomol. Tech.* **2007**, *18*, 185-187.
- 2 Robb, N. C.; Taylor, J. M.; Kent, A.; Pambos, O. J.; Gilboa, B.; Evangelidou, M.; Mentis, A.F.; Kapanidis, A.N. Rapid Functionalisation and Detection of Viruses via a Novel Ca(2+)-Mediated Virus-DNA Interaction. *Sci. Rep.* **2019**, *9*, 16219, DOI:10.1038/s41598-019-52759-5.
- 3 Mello, M. L.; Vidal, B. C. Changes in the Infrared Microspectroscopic Characteristics of DNA Caused by Cationic Elements, Different Base Richness and Single-Stranded Form. *PLoS One* **2012**, *7*, e43169, DOI:10.1371/journal.pone.0043169.
- 4 Al-Jorani, K.; Ruther, A.; Martin, M.; Haputhanthri, R.; Deacon, G.B.; Li, H.L.; Wood, B. The Application of ATR-FTIR Spectroscopy and the Reversible DNA Conformation as a Sensor to Test the Effectiveness of Platinum(II) Anticancer Drugs. *Sensors* **2018**, *18*, DOI:10.3390/s18124297 (2018).
- 5 Ganin, U. E.; Ajakan, H.; Germain, P., Larochelle, H.; Laviolette, F.; Marchand, M.; Lempitsky, V. Domain-Adversarial Training of Neural Networks. *J. Mach. Learn. Res.* **2016**, *17*, 35.
- 6 CDC. Real-Time RT-PCR Panel for Detection 2019-nCoV (US Centers for Disease Control and Prevention, 2020); Available at: <https://www.cdc.gov/coronavirus/2019-ncov/lab/RT-PCR-detection-instructions.html>. (2020).
